# Supplementary material for: Discontinuation of oral anticoagulation in atrial fibrillation and risk of ischaemic stroke
Source: HighWire-hosted journal article supplement (doi:10.1136/heartjnl-2020-317887), 2020-12-11
Supplement: heartjnl-2020-317887supp001_data_supplement.pdf [file heartjnl-2020-317887supp001_data_supplement.pdf]

## **Online Appendix**

### **Appendix Methods**

#### **Exposure to oral anticoagulants**

The length of an individual prescription in IMRD-UK was based on the number of tablets prescribed and the dosing instructions. For OAC prescriptions in the National Danish Prescription Registry, and for OAC prescriptions in IMRD-UK with unclear dosing instructions, the length of a prescription for warfarin, phenprocoumon or rivaroxaban was based on the number of tablets prescribed (UK)/dispensed (Denmark), and for apixaban, dabigatran and edoxaban it was based on the number of tablets prescribed divided by two, as per the posology on the respective drug labels.

#### **Comorbidities**

For all incident IS cases and their controls, we obtained data on comorbidities any time before the index date. In Denmark, we identified comorbidities from the National Danish Patient Registry<sup>1</sup> with additional information obtained from the National Danish Prescription Registry<sup>2</sup> to identify certain conditions (hypertension, diabetes, myocardial infarction, chronic obstructive pulmonary disease and peripheral artery disease). We calculated the CHA<sub>2</sub>DS<sub>2</sub>Vasc score for stroke risk using patients' recorded history of congestive heart failure, hypertension, age, diabetes mellitus and prior stroke/transient ischaemic attack. Renal function was ascertained using data on the most recent estimated glomerular filtration rate (eGFR, expressed as ml/min/1.73m<sup>2</sup>) from the Register of Laboratory Results for Research in Denmark, and from recorded serum creatinine values in the IMRD-UK applying the Chronic Kidney Disease Epidemiology (CKD-EPI) Collaboration equation,<sup>3</sup> but omitting ethnicity because this is not routinely recorded in UK primary care. Coded clinical entries indicating CKD stage, acute or chronic dialysis were also used to determine renal function among UK patients. To obtain the eGFR values, we also accessed data from the Register of Laboratory Results for Research, which holds information on results of blood tests reported by medical laboratories at Danish hospitals performed for both inpatients and outpatients as well as covering blood tests ordered by general practitioners.

We determined whether cases and controls had a history of stroke (IS or intracranial bleeding) any time before the start date (before the start of follow-up), in addition to any time before the index date. In Denmark, stroke history was determined from both the Patient Registry and the Stroke Registry. This was because while the Stroke Registry data for IS outcome identification has a higher positive predictive value (and thus was used for incident IS case identification during follow-up), the Patient Registry contains data back to 1977.

#### **Demographics, lifestyle factors and healthcare use**

We obtained data on demographics (age and sex), current smoking status (UK only; using the most recent status before the index date), and healthcare use (0, 1, 2 or  $\geq 3$  hospitalizations in the year before the index date; 0–1, 2–4, 5–9, 10–14, 15–19,  $\geq 20$  referrals/outpatient contacts in the year before the index date), which were obtained from the Patient Registry for Denmark. Use of drugs other than OACs, including low-dose aspirin, digoxin, anti-arrhythmic drugs, statins, proton pump inhibitors, selective serotonin re-uptake inhibitors, and nonsteroidal anti-inflammatory drugs was determined using the same categories as those described for OACs, with the exception of non-use which was defined as no use of the drug in the year before the index date.

### **Calculation of potentially preventable IS cases nationwide among patients receiving OAC therapy if OAC discontinuation was avoided**

We used the number of incident cases of IS who were OAC discontinuers at the time of their stroke during the last full year of the follow-up period (2017 UK; 2018 Denmark). These numbers were then multiplied by a factor of 26.1 for the UK and by a factor of 4.7 for Denmark, which represent the magnitude greater the nationwide population aged 20–89 years was to the population of the respective data source (IMRD-UK/RSD) of the same age range. We calculated these multiplicative factors using population estimates from the Office for National Statistics in the UK (mid-2017 estimates),<sup>4</sup> from Statistics Denmark (first quarter of 2018).<sup>5</sup> The estimates were based on the assumption that the number of IS cases across the country did not vary substantially by region.

### **Sensitivity analysis**

In a sensitivity analysis of the UK data, we repeated our main analyses after removing all OAC discontinuers among IS cases and controls where the reason to discontinue OAC therapy was recorded as due to a major bleeding event (including intracranial, gastrointestinal, urogenital, hemothorax, epistaxis or subconjunctival). These patients were identified through a manual review of the relevant patients' EHRs by one investigator (LAGR).

### **References**

1. Schmidt M, Schmidt SA, Sandegaard JL, Ehrenstein V, Pedersen L, Sorensen HT. The Danish National Patient Registry: a review of content, data quality, and research potential. *Clin Epidemiol.* 2015; 7:449–490.
2. Gaist D, Sorensen HT, Hallas J. The Danish prescription registries. *Dan Med Bull.* 1997;44(4):445–448.
3. Levey AS, Stevens LA, Schmid CH, et al. A new equation to estimate glomerular filtration rate. *Ann Intern Med.* 2009;150(9):604–612.
4. Office for National Statistics. Estimates of the population for the UK, England and Wales, Scotland and Northern Ireland, Mid 2017. <https://www.ons.gov.uk/peoplepopulationandcommunity/populationandmigration/populationestimates/datasets/populationestimatesforukenglandandwalescotlandandnorthernireland>
5. Statistics Denmark. <https://www.dst.dk/en/Statistik/emner/befolkning-og-valg>

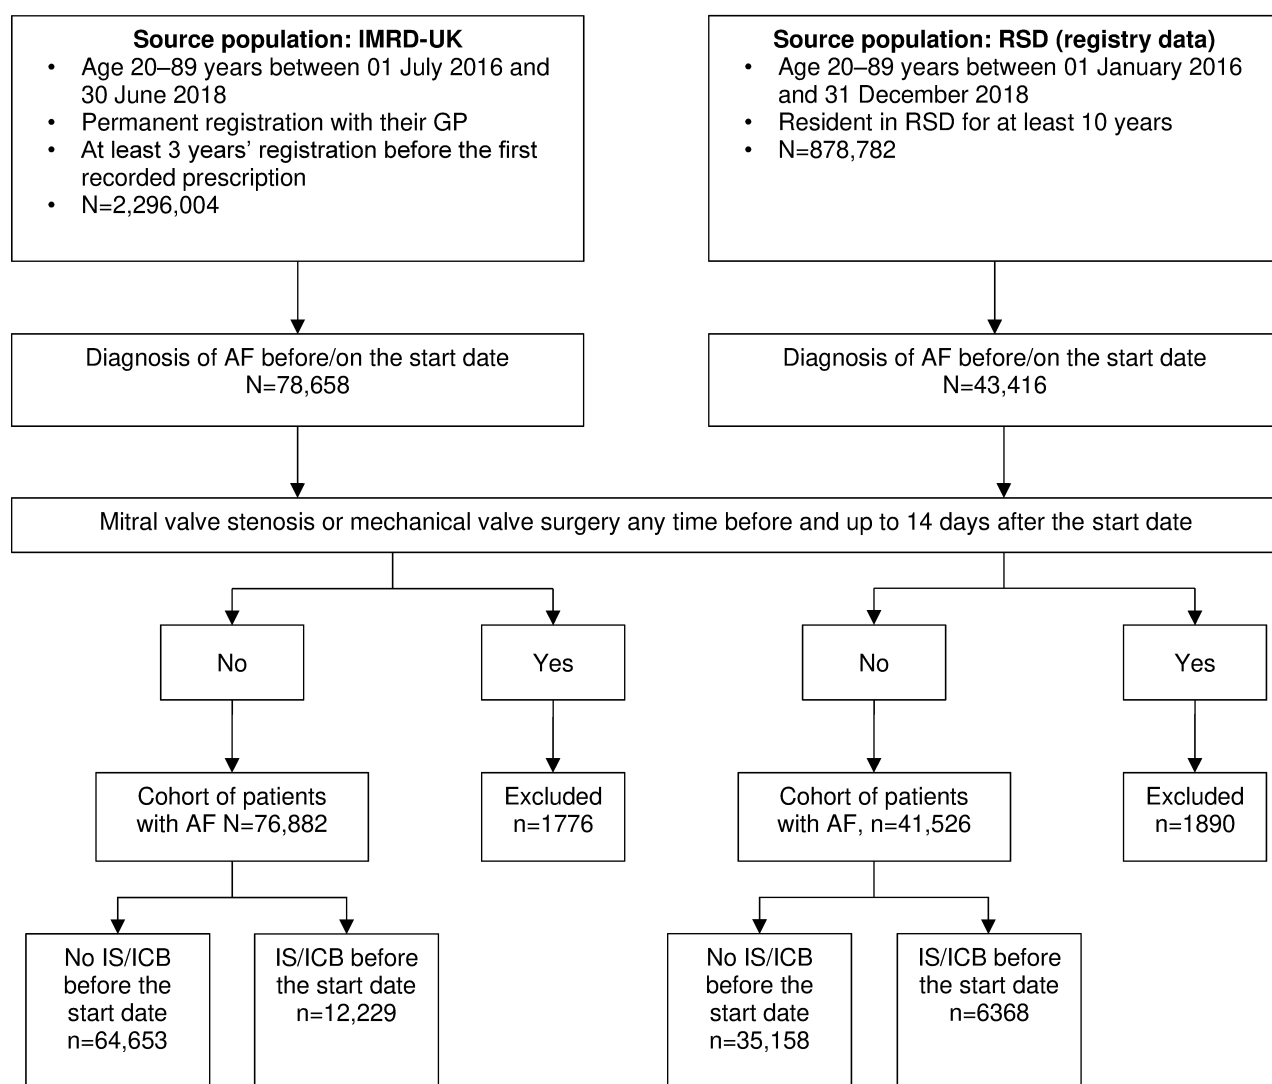

**Appendix Figure 1.** Identification of the AF study cohort in the UK and Denmark datasets. AF, atrial fibrillation; GP, general practitioner; ICB, intracranial bleeding; IMRD, IQVIA medical research databases; IS, ischaemic stroke; RSD, Region of Southern Denmark; UK, United Kingdom

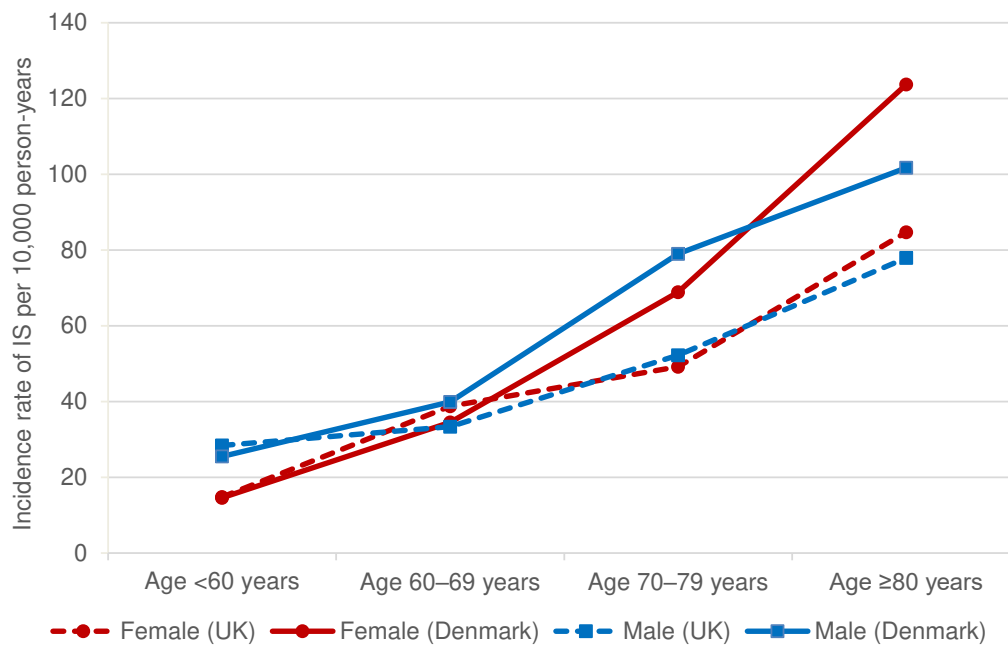

**Appendix Figure 2.** Age- and sex-specific incidence rate of IS per 10,000 person-years among patients with AF in the UK and Denmark.  
AF, atrial fibrillation; IS, ischaemic stroke; UK, United Kingdom

**Appendix Table 1.** Incidence rate of IS per 10,000 person-years by age and sex.

| Age (years) | Incidence rate per 10,000 person-years |                  |           |                |
|-------------|----------------------------------------|------------------|-----------|----------------|
|             | Female (UK)                            | Female (Denmark) | Male (UK) | Male (Denmark) |
| <60         | 14.8                                   | 14.6             | 28.4      | 25.5           |
| 60–69       | 38.8                                   | 34.5             | 33.4      | 39.9           |
| 70–79       | 49.2                                   | 68.9             | 52.2      | 79.0           |
| ≥80         | 84.7                                   | 123.7            | 77.9      | 101.7          |

IS, ischaemic stroke; UK, United Kingdom

**Appendix Table 2.** Characteristics of incident IS cases and controls, and odds ratios (95% CI) for their association their association with IS.

Note: Adjusted ORs shown in bold italics are those considered significant at the 5% significance level.

|                                                                 | UK (IMRD-UK)   |      |                    |      |                                      | Denmark (RSD)  |      |                    |      |                                      |
|-----------------------------------------------------------------|----------------|------|--------------------|------|--------------------------------------|----------------|------|--------------------|------|--------------------------------------|
|                                                                 | Cases<br>N=615 |      | Controls<br>N=3075 |      | Adjusted OR<br>(95% CI) <sup>a</sup> | Cases<br>N=643 |      | Controls<br>N=6430 |      | Adjusted OR<br>(95% CI) <sup>*</sup> |
|                                                                 | n              | %    | n                  | %    |                                      | n              | %    | n                  | %    |                                      |
| <b>Demographics</b>                                             |                |      |                    |      |                                      |                |      |                    |      |                                      |
| Males                                                           | 345            | 56.1 | 1725               | 56.1 | NA                                   | 358            | 55.7 | 3580               | 55.7 | NA                                   |
| Females                                                         | 270            | 43.9 | 1350               | 43.9 | NA                                   | 285            | 44.3 | 2850               | 44.3 | NA                                   |
| Age <60 years                                                   | 35             | 5.7  | 171                | 5.6  | NA                                   | 24             | 3.7  | 244                | 3.8  | NA                                   |
| Age 60–69 years                                                 | 79             | 12.8 | 342                | 11.1 | NA                                   | 78             | 12.1 | 778                | 12.1 | NA                                   |
| Age 70–79 years                                                 | 198            | 32.2 | 981                | 31.9 | NA                                   | 235            | 36.5 | 2320               | 36.2 | NA                                   |
| Age ≥80 years                                                   | 303            | 49.3 | 1581               | 51.4 | NA                                   | 306            | 47.6 | 3078               | 47.9 | NA                                   |
| <b>Referrals (UK) / outpatient visits (Denmark)<sup>†</sup></b> |                |      |                    |      |                                      |                |      |                    |      |                                      |
| 0–1                                                             | 58             | 9.4  | 365                | 11.9 | 1.00 (reference)                     | 157            | 24.4 | 1879               | 29.2 | 1.00 (reference)                     |
| 2–4                                                             | 94             | 15.3 | 643                | 20.9 | 0.87 (0.60 to 1.25)                  | 125            | 19.4 | 1429               | 22.2 | 0.98 (0.77 to 1.27)                  |
| 5–9                                                             | 150            | 24.4 | 794                | 25.8 | 0.98 (0.70 to 1.38)                  | 136            | 21.2 | 1380               | 21.5 | 1.09 (0.85 to 1.40)                  |
| 10–14                                                           | 113            | 18.4 | 564                | 18.3 | 0.95 (0.66 to 1.37)                  | 77             | 12.0 | 650                | 10.1 | 1.24 (0.91 to 1.68)                  |
| 15–19                                                           | 88             | 14.3 | 335                | 10.9 | 1.09 (0.73 to 1.61)                  | 51             | 7.9  | 399                | 6.2  | 1.31 (0.92 to 1.88)                  |
| ≥20                                                             | 112            | 18.2 | 374                | 12.2 | 1.04 (0.70 to 1.54)                  | 97             | 15.1 | 693                | 10.8 | 1.28 (0.93 to 1.75)                  |
| <b>Hospitalizations<sup>‡</sup></b>                             |                |      |                    |      |                                      |                |      |                    |      | –                                    |
| None                                                            | 283            | 46.0 | 2134               | 69.4 | 1.00 (reference)                     | 347            | 54.0 | 4223               | 65.7 | 1.00 (reference)                     |
| 1                                                               | 157            | 25.5 | 457                | 14.9 | <b>2.50 (1.98 to 3.17)</b>           | 128            | 19.9 | 1078               | 16.8 | <b>1.34 (1.07 to 1.68)</b>           |

|                                                                    | UK (IMRD-UK)   |       |                    |      |                                      | Denmark (RSD)  |      |                    |      |                                      |
|--------------------------------------------------------------------|----------------|-------|--------------------|------|--------------------------------------|----------------|------|--------------------|------|--------------------------------------|
|                                                                    | Cases<br>N=615 |       | Controls<br>N=3075 |      | Adjusted OR<br>(95% CI) <sup>a</sup> | Cases<br>N=643 |      | Controls<br>N=6430 |      | Adjusted OR<br>(95% CI) <sup>*</sup> |
|                                                                    | n              | %     | n                  | %    |                                      | n              | %    | n                  | %    |                                      |
| 2                                                                  | 72             | 11.7  | 231                | 7.5  | <b>2.23 (1.62 to 3.05)</b>           | 79             | 12.3 | 522                | 8.1  | <b>1.64 (1.24 to 2.17)</b>           |
| ≥3                                                                 | 103            | 16.7  | 253                | 8.2  | <b>2.79 (2.06 to 3.79)</b>           | 89             | 13.8 | 607                | 9.4  | <b>1.43 (1.07 to 1.90)</b>           |
| <b>Current smoker<sup>‡</sup></b>                                  | 60             | 9.8   | 211                | 6.9  | 1.27 (0.90 to 1.79)                  | NA             | NA   | NA                 | NA   | –                                    |
| <b>Cerebrovascular disease before the start date</b>               |                |       |                    |      |                                      |                |      |                    |      |                                      |
| IS                                                                 | 127            | 20.7  | 350                | 11.4 | <b>1.65 (1.34 to 2.04)</b>           | 209            | 32.5 | 1037               | 16.1 | <b>2.33 (1.94 to 2.81)</b>           |
| ICB                                                                | 25             | 4.1   | 56                 | 1.8  | <b>1.92 (1.16 to 3.16)</b>           | 32             | 5.0  | 196                | 3.0  | 1.15 (0.78 to 1.72)                  |
| <b>Comorbidities before the index date</b>                         |                |       |                    |      |                                      |                |      |                    |      |                                      |
| Myocardial infarction                                              | 94             | 15.3  | 398                | 12.9 | 0.96 (0.74 to 1.25)                  | 107            | 16.6 | 856                | 13.3 | 1.07 (0.85 to 1.36)                  |
| Heart failure                                                      | 139            | 22.6  | 656                | 21.3 | 0.94 (0.76 to 1.17)                  | 139            | 21.6 | 1269               | 19.7 | 0.99 (0.81 to 1.21)                  |
| DVT/PE                                                             | 73             | 11.79 | 385                | 12.5 | 0.86 (0.65 to 1.14)                  | 44             | 6.8  | 483                | 7.5  | 0.87 (0.63 to 1.20)                  |
| PAD                                                                | 52             | 8.5   | 201                | 6.5  | 0.98 (0.70 to 1.38)                  | 90             | 14.0 | 547                | 8.5  | <b>1.51 (1.17 to 1.94)</b>           |
| Cancer                                                             | 187            | 30.4  | 841                | 27.3 | 1.09 (0.89 to 1.33)                  | 132            | 20.5 | 1300               | 20.2 | 0.95 (0.77 to 1.17)                  |
| Hypertension                                                       | 441            | 71.7  | 2139               | 69.6 | 1.01 (0.82 to 1.24)                  | 550            | 85.5 | 5350               | 83.2 | 1.01 (0.80 to 1.29)                  |
| Diabetes                                                           | 170            | 27.6  | 734                | 23.9 | 1.11 (0.90 to 1.36)                  | 164            | 25.5 | 1322               | 20.6 | <b>1.21 (1.00 to 1.46)</b>           |
| COPD                                                               | 104            | 16.9  | 370                | 12.0 | 1.26 (0.98 to 1.63)                  | 91             | 14.2 | 820                | 12.8 | 0.99 (0.78 to 1.27)                  |
| Dementia                                                           | 39             | 6.3   | 158                | 5.1  | 1.02 (0.69 to 1.52)                  | 36             | 5.6  | 321                | 5.0  | 0.92 (0.64 to 1.33)                  |
| <b>Other comorbidities and comedications before the index date</b> |                |       |                    |      |                                      |                |      |                    |      |                                      |
| Urogenital bleeding                                                | 104            | 16.9  | 456                | 14.8 | 1.10 (0.86 to 1.41)                  | 69             | 10.7 | 571                | 8.9  | 1.19 (0.91 to 1.56)                  |

|                                              | UK (IMRD-UK)   |      |                    |      |                                      | Denmark (RSD)  |      |                    |      |                                      |
|----------------------------------------------|----------------|------|--------------------|------|--------------------------------------|----------------|------|--------------------|------|--------------------------------------|
|                                              | Cases<br>N=615 |      | Controls<br>N=3075 |      | Adjusted OR<br>(95% CI) <sup>a</sup> | Cases<br>N=643 |      | Controls<br>N=6430 |      | Adjusted OR<br>(95% CI) <sup>*</sup> |
|                                              | n              | %    | n                  | %    |                                      | n              | %    | n                  | %    |                                      |
| Gastrointestinal bleeding                    | 115            | 18.7 | 486                | 15.8 | 1.07 (0.85 to 1.25)                  | 99             | 15.4 | 726                | 11.3 | 1.26 (1.00 to 1.60)                  |
| COPD                                         | 104            | 16.9 | 370                | 12.0 | 1.26 (0.98 to 1.63)                  | 91             | 14.2 | 820                | 12.8 | 0.99 (0.78 to 1.27)                  |
| CHA <sub>2</sub> DS <sub>2</sub> -VASc score |                |      |                    |      |                                      |                |      |                    |      |                                      |
| 0–1                                          | 58             | 9.4  | 335                | 10.9 | 1.00 (reference)                     | 51             | 7.9  | 726                | 11.3 | 1.00 (reference)                     |
| 2                                            | 90             | 14.6 | 481                | 15.6 | 1.17 (0.76 to 1.78)                  | 84             | 13.1 | 1040               | 16.2 | 1.29 (0.86 to 1.95)                  |
| 3                                            | 95             | 15.4 | 603                | 19.6 | 0.85 (0.55 to 1.31)                  | 94             | 14.6 | 1517               | 23.6 | 1.01 (0.66 to 1.56)                  |
| 4                                            | 155            | 25.2 | 830                | 27.0 | 1.06 (0.68 to 1.66)                  | 166            | 25.8 | 1519               | 23.6 | <b>1.65 (1.06 to 2.58)</b>           |
| 5                                            | 112            | 18.2 | 491                | 16.0 | 1.12 (0.70 to 1.81)                  | 126            | 19.6 | 856                | 13.3 | <b>1.77 (1.08 to 2.90)</b>           |
| 6                                            | 62             | 10.1 | 230                | 7.5  | 1.18 (0.69 to 2.02)                  | 70             | 10.9 | 521                | 8.1  | 1.28 (0.72 to 2.26)                  |
| 7–9                                          | 43             | 7.0  | 105                | 3.4  | 1.39 (0.75 to 2.59)                  | 52             | 8.1  | 251                | 3.9  | 1.69 (0.90 to 3.16)                  |
| eGFR (ml/min/1.73m <sup>2</sup> )            |                |      |                    |      |                                      |                |      |                    |      |                                      |
| <30                                          | 17             | 2.8  | 73                 | 2.4  | 0.84 (0.45 to 1.56)                  | 36             | 5.6  | 242                | 3.8  | 0.93 (0.55 to 1.57)                  |
| 30–59                                        | 170            | 27.6 | 866                | 28.2 | 0.92 (0.66 to 1.27)                  | 208            | 32.3 | 2164               | 33.7 | <b>0.65 (0.43 to 0.97)</b>           |
| 60–89                                        | 255            | 41.5 | 1234               | 40.1 | 1.03 (0.76 to 1.39)                  | 292            | 45.4 | 2939               | 45.7 | 0.71 (0.49 to 1.05)                  |
| ≥90 (reference)                              | 71             | 11.5 | 367                | 11.9 | 1.00 (reference)                     | 39             | 6.1  | 253                | 3.9  | 1.0 (reference)                      |
| Missing                                      | 102            | 16.6 | 535                | 17.4 | 1.05 (0.74 to 1.50)                  | 68             | 10.6 | 832                | 12.9 | 0.70 (0.45 to 1.09)                  |
| <b>Medication use<sup>§</sup></b>            |                |      |                    |      |                                      |                |      |                    |      |                                      |
| Antiplatelets                                | 157            | 25.5 | 470                | 15.3 | <b>1.85 (1.49 to 2.30)</b>           | 149            | 23.2 | 1124               | 17.5 | <b>1.34 (1.10 to 1.64)</b>           |
| Antiarrhythmics                              | 40             | 6.5  | 357                | 11.6 | <b>0.53 (0.37 to 0.75)</b>           | 41             | 6.4  | 492                | 7.7  | 0.76 (0.54 to 1.07)                  |
| Digoxin                                      | 101            | 16.4 | 500                | 16.3 | 1.06 (0.83 to 1.35)                  | 136            | 21.2 | 1223               | 19.0 | 1.17 (0.95 to 1.44)                  |



|                   | UK (IMRD-UK)   |      |                    |      |                                      | Denmark (RSD)  |      |                    |      |                                      |
|-------------------|----------------|------|--------------------|------|--------------------------------------|----------------|------|--------------------|------|--------------------------------------|
|                   | Cases<br>N=615 |      | Controls<br>N=3075 |      | Adjusted OR<br>(95% CI) <sup>a</sup> | Cases<br>N=643 |      | Controls<br>N=6430 |      | Adjusted OR<br>(95% CI) <sup>*</sup> |
|                   | n              | %    | n                  | %    |                                      | n              | %    | n                  | %    |                                      |
| Statins           | 292            | 47.5 | 1613               | 52.5 | <b>0.70 (0.57 to 0.85)</b>           | 254            | 39.5 | 2656               | 41.3 | 0.83 (0.69 to 1.00)                  |
| Antihypertensives | 495            | 80.5 | 2588               | 84.2 | 0.93 (0.65 to 1.35)                  | 370            | 57.5 | 3691               | 57.4 | 0.99 (0.83 to 1.19)                  |
| NSAIDs            | 12             | 2.0  | 51                 | 1.7  | 1.20 (0.61 to 2.35)                  | 33             | 5.1  | 214                | 3.3  | <b>1.69 (1.15 to 2.49)</b>           |
| SSRI              | 61             | 9.9  | 228                | 7.4  | 1.12 (0.82 to 1.53)                  | 69             | 10.7 | 532                | 8.3  | 1.10 (0.84 to 1.45)                  |
| PPIs              | 212            | 34.5 | 1036               | 33.7 | 0.84 (0.69 to 1.04)                  | 197            | 30.6 | 1482               | 23.0 | <b>1.27 (1.05 to 1.53)</b>           |

<sup>\*</sup>Adjusted by the number of referrals/outpatient contacts in the year before the index date, the number of hospitalizations in the year before the index date, use of an antiplatelet medication 0–7 days before the index date, use of an antiarrhythmic medication 0–7 days before the index date (UK analysis only), and cerebrovascular disease before the start date.

<sup>†</sup>In the year before the index date.

<sup>‡</sup>The reference group for smoking was never smoker.

<sup>§</sup>Medication use was use on the index date or within 7 days before the index date; the reference group was non-use (no prescription before the index date).

**Note:** 615 incident cases of IS were available for the nested case–control analysis based on the most recent IMRD-UK data update at the time these analyses were performed (one case was no longer in the database).

AF, atrial fibrillation; CI, confidence interval; COPD, chronic obstructive pulmonary disease; DVT, deep vein thrombosis; eGFR, estimated glomerular filtration rate; GIB, gastrointestinal bleeding; ICB, intracranial bleeding; IS, ischaemic stroke; NSAID, non-steroidal anti-inflammatory drug; OR, odds ratio; PAD, peripheral artery disease; PPI, proton pump inhibitor; PE, pulmonary embolism; SSRI, selective serotonin re-uptake inhibitor

**Appendix Table 3.** Odds ratios (95% CI) for the associations between previous duration of OAC use among discontinuers and the risk of IS among patients with AF.

|                                        | UK (IMRD-UK)   |      |                    |      |                      |                                      | Denmark (RSD)  |      |                    |      |                      |                                      |
|----------------------------------------|----------------|------|--------------------|------|----------------------|--------------------------------------|----------------|------|--------------------|------|----------------------|--------------------------------------|
|                                        | Cases<br>N=615 |      | Controls<br>N=3075 |      | Crude OR<br>(95% CI) | Adjusted OR <sup>a</sup><br>(95% CI) | Cases<br>N=643 |      | Controls<br>N=6430 |      | Crude OR<br>(95% CI) | Adjusted OR <sup>a</sup><br>(95% CI) |
|                                        | n              | %    | n                  | %    |                      |                                      | n              | %    | n                  | %    |                      |                                      |
| <b>Currently exposed to a NOAC/VKA</b> | 267            | 43.4 | 1994               | 64.8 | 1.0 (reference)      | 1.0 (reference)                      | 339            | 52.7 | 4239               | 65.9 | 1.0 (reference)      | 1.0 (reference)                      |
| <b>Any OAC discontinued</b>            |                |      |                    |      |                      |                                      |                |      |                    |      |                      |                                      |
| Duration ≤120 days                     | 48             | 7.8  | 120                | 3.9  | 3.02 (2.10–4.33)     | 2.59 (1.75–3.82)                     | 51             | 7.9  | 268                | 4.2  | 2.29 (1.63–3.21)     | 2.58 (1.79–3.71)                     |
| Duration >120 days                     | 89             | 14.5 | 193                | 6.3  | 3.40 (2.57–4.51)     | 3.22 (2.39–4.33)                     | 80             | 12.4 | 515                | 8.0  | 2.02 (1.53–2.66)     | 2.04 (1.51–2.75)                     |
| Duration ≤365 days                     | 90             | 14.6 | 201                | 6.5  | 3.36 (2.53–4.45)     | 3.12 (2.30–4.23)                     | 97             | 15.1 | 561                | 8.7  | 2.26 (1.75–2.93)     | 2.43 (1.85–3.21)                     |
| Duration >365 days                     | 47             | 7.6  | 112                | 3.6  | 3.09 (2.14–4.44)     | 2.75 (1.88–4.04)                     | 34             | 5.3  | 222                | 3.5  | 1.82 (1.22–2.71)     | 1.83 (1.20–2.79)                     |
| <b>VKA discontinued</b>                |                |      |                    |      |                      |                                      |                |      |                    |      |                      |                                      |
| Duration ≤120 days                     | 26             | 4.2  | 78                 | 2.5  | 2.50 (1.58–3.96)     | 2.13 (1.31–3.47)                     | 24             | 3.7  | 156                | 2.4  | 1.70 (1.07–2.70)     | 1.80 (1.09–2.96)                     |
| Duration >120 days                     | 58             | 9.4  | 157                | 5.1  | 2.69 (1.94–3.73)     | 2.63 (1.86–3.71)                     | 51             | 7.9  | 383                | 6.0  | 1.77 (1.27–2.45)     | 1.77 (1.24–2.54)                     |
| Duration ≤365 days                     | 53             | 8.6  | 145                | 4.7  | 2.72 (1.94–3.83)     | 2.58 (1.80–3.70)                     | 54             | 8.4  | 375                | 5.8  | 1.86 (1.35–2.57)     | 1.94 (1.36–2.77)                     |
| Duration >365 days                     | 31             | 5.0  | 90                 | 2.9  | 2.48 (1.62–3.80)     | 2.28 (1.46–3.56)                     | 21             | 3.3  | 164                | 2.6  | 1.53 (0.94–2.49)     | 1.55 (0.93–2.60)                     |
| <b>NOAC discontinued</b>               |                |      |                    |      |                      |                                      |                |      |                    |      |                      |                                      |
| Duration ≤120 days                     | 25             | 4.1  | 42                 | 1.4  | 4.62 (2.74–7.78)     | 4.09 (2.33–7.18)                     | 28             | 4.4  | 127                | 2.0  | 2.82 (1.77–4.48)     | 3.49 (2.15–5.67)                     |
| Duration >120 days                     | 28             | 4.6  | 36                 | 1.2  | 6.34 (3.73–10.76)    | 5.81 (3.33–10.13)                    | 28             | 4.4  | 117                | 1.8  | 3.28 (2.03–5.30)     | 3.51 (2.13–5.80)                     |
| Duration ≤365 days                     | 42             | 6.8  | 59                 | 1.9  | 5.59 (3.46–8.59)     | 5.21 (3.28–8.27)                     | 45             | 7.0  | 198                | 3.1  | 3.06 (2.09–4.49)     | 3.62 (2.43–5.38)                     |
| Duration >365 days                     | 11             | 1.8  | 19                 | 0.6  | 4.72 (2.20–10.15)    | 3.96 (1.79–8.76)                     | 11             | 1.7  | 46                 | 0.7  | 3.02 (1.44–6.36)     | 2.92 (1.33–6.39)                     |

\*Adjusted by number of referrals/outpatient visits in the year before the index date, the number of hospitalizations in the year before the index date, use of an antiplatelet medication 0–7 days before the index date, use of an antiarrhythmic medication 0–7 days before the index date (UK analysis only), and cerebrovascular disease before the start date.

AF, atrial fibrillation; CI, confidence interval; IS, ischaemic stroke, NOAC, non-vitamin K antagonist oral anticoagulant; OAC, oral anticoagulant; OR, odds ratio; RSD, Region of Southern Denmark; VKA, vitamin K antagonist; UK, United Kingdom

**Appendix Table 4.** Odds ratios (95% CI) for the association between OAC discontinuation and the risk of IS among patients with AF using never use of OAC as the reference group.

|                                                  | UK (IMRD-UK)   |      |                    |      |                      |                          | Denmark (RSD)  |      |                    |      |                      |                          |
|--------------------------------------------------|----------------|------|--------------------|------|----------------------|--------------------------|----------------|------|--------------------|------|----------------------|--------------------------|
|                                                  | Cases<br>N=615 |      | Controls<br>N=3075 |      | Crude OR<br>(95% CI) | Adjusted OR*<br>(95% CI) | Cases<br>N=643 |      | Controls<br>N=6430 |      | Crude OR<br>(95% CI) | Adjusted<br>OR* (95% CI) |
|                                                  | n              | %    | n                  | %    |                      |                          | n              | %    | n                  | %    |                      |                          |
| <b>Never use of OAC</b>                          | 176            | 28.6 | 640                | 20.8 | 1.0 (reference)      | 1.0 (reference)          | 142            | 22.1 | 1188               | 22.1 | 1.0 (reference)      | 1.0<br>(reference)       |
| <b>Currently exposed to an OAC (NOAC or VKA)</b> | 267            | 43.4 | 1994               | 64.8 | 0.48 (0.39–0.59)     | 0.50 (0.39–0.64)         | 339            | 52.7 | 4239               | 65.9 | 0.65 (0.52–0.80)     | 0.57 (0.48–0.72)         |
| <b>OAC discontinuation at any time</b>           | 137            | 22.3 | 313                | 10.2 | 1.55 (1.19–2.03)     | 1.52 (1.14–2.01)         | 131            | 20.4 | 783                | 12.2 | 1.40 (1.08–1.81)     | 1.27 (0.98–1.66)         |

\*Adjusted by number of referrals/outpatient visits in the year before the index date, the number of hospitalizations in the year before the index date, use of an antiplatelet medication 0–7 days before the index date, use of an antiarrhythmic medication 0–7 days before the index date (UK analysis only), and cerebrovascular disease before the start date.

Note: Cases and controls not included in the analysis were as follows: Denmark, 9/43 current switchers, 5/66 intermediate users of VKA and 17/111 intermediate users of NOAC; UK, 6/11 current switchers, 16/62 intermediate users of VKA and 13/55 intermediate users of NOAC.

AF, atrial fibrillation; CI, confidence interval; IS, ischaemic stroke, NOAC, non-vitamin K antagonist oral anticoagulant; OAC, oral anticoagulant; OR, odds ratio; RSD, Region of Southern Denmark; VKA, vitamin K antagonist; UK, United Kingdom
